# Supplementary material for: Relationship of Fibroblast Growth Factor 23 Serum Levels with Disease Characteristics in Systemic Lupus Erythematosus Patients
Source: MDPI journal article supplement (doi:10.3390/biom13081222), 2023-08-05
Supplement: s1 [file s1]

**Supplementary Table S1.** Relationship of SLICC-SDI score items with FGF23.

|                                                       | FGF23, pg/ml |    |                     |              |
|-------------------------------------------------------|--------------|----|---------------------|--------------|
|                                                       | n            | %  | Beta Coef.<br>(95%) | p            |
| <b>Ocular</b>                                         |              |    |                     |              |
| Any cataract ever                                     | 29           | 11 | −5 (−44–34)         | 0.81         |
| Retinal change or optic atrophy                       | 33           | 12 | −24 (−61–14)        | 0.21         |
| <i>Points ≥1 in the domain</i>                        | 63           | 22 | 5 (−23–34)          | 0.71         |
| <b>Neuropsychiatric</b>                               |              |    |                     |              |
| Cognitive impairment                                  | 7            | 3  | 10 (−62–81)         | 0.79         |
| Seizures requiring therapy for 6 months               | 15           | 5  | 18 (−31–68)         | 0.47         |
| Cerebrovascular accident ever                         | 13           | 5  | 34 (−31–68)         | 0.27         |
| Cranial or peripheral neuropathy                      | 5            | 2  | −27 (−121–68)       | 0.58         |
| Transverse myelitis                                   | 1            | 0  | −                   | −            |
| <i>Points ≥1 in the domain</i>                        | 40           | 14 | 23 (−11–57)         | 0.18         |
| <b>Renal</b>                                          |              |    |                     |              |
| Estimated or measured glomerular filtration rate <50% | 13           | 5  | 5 (−52–62)          | 0.86         |
| Proteinuria ≥3.5 g/24 h                               | 7            | 3  | <b>82 (12–152)</b>  | <b>0.022</b> |
| End-stage renal disease                               | 4            | 1  | 27 (−4–58)          | 0.090        |
| <i>Points ≥1 in the domain</i>                        | 28           | 10 | 30 (−8–69)          | 0.12         |
| <b>Pulmonary</b>                                      |              |    |                     |              |
| Pulmonary hypertension                                | 4            | 1  | −17 (−126–91)       | 0.75         |
| Pulmonary fibrosis                                    | 4            | 1  | 15 (−80–109)        | 0.76         |
| Shrinking lung                                        | 2            | 1  | −3 (−136–130)       | 0.97         |
| Pleural fibrosis                                      | 1            | 0  | −50 (−237–138)      | 0.60         |
| Pulmonary infarction                                  | 1            | 0  | 36 (−152–224)       | 0.71         |
| <i>Points ≥1 in the domain</i>                        | 19           | 7  | −15 (−60–31)        | 0.53         |
| <b>Cardiovascular</b>                                 |              |    |                     |              |
| Angina or coronary artery bypass                      | 4            | 1  | −9 (−103–86)        | 0.85         |
| Myocardial infarction ever                            | 2            | 1  | −30 (−163–103)      | 0.66         |
| Cardiomyopathy                                        | 2            | 1  | −43 (−176–90)       | 0.52         |
| Valvular disease                                      | 9            | 3  | −13 (−76–51)        | 0.70         |
| Pericarditis for 6 months, or pericardiectomy         | 2            | 1  | −13 (−146–120)      | 0.85         |
| <i>Points ≥1 in the domain</i>                        | 23           | 8  | −20 (−60–21)        | 0.34         |
| <b>Peripheral vascular</b>                            |              |    |                     |              |
| Claudication for 6 months                             | 3            | 1  | −13 (−121–95)       | 0.81         |
| Minor tissue loss (pulp space)                        | 5            | 2  | 6 (−78–90)          | 0.88         |
| Significant tissue loss ever                          | 0            | 0  | −                   | −            |
| Venous thrombosis                                     | 14           | 5  | −30 (−81–22)        | 0.26         |
| <i>Points ≥1 in the domain</i>                        | 34           | 12 | −9 (−43–26)         | 0.62         |
| <b>Gastrointestinal</b>                               |              |    |                     |              |

|                                                                                        |    |    |                   |                  |
|----------------------------------------------------------------------------------------|----|----|-------------------|------------------|
| Infarction or resection of bowel                                                       | 22 | 8  | −14 (−56–29)      | 0.53             |
| Mesenteric insufficiency                                                               | 1  | 0  | −67 (−254–121)    | 0.49             |
| Infarction or resection of bowel below duodenum, spleen, liver, or chronic peritonitis | 1  | 0  | −29 (−217–158)    | 0.76             |
| Stricture or upper gastrointestinal tract surgery ever                                 | 0  | 0  | −                 | −                |
| Pancreatic insufficiency                                                               | 0  | 0  | −                 | −                |
| <i>Points ≥1 in the domain</i>                                                         | 28 | 10 | −14 (−52–24)      | 0.47             |
| Musculoskeletal                                                                        |    |    |                   |                  |
| Muscle atrophy or weakness                                                             | 3  | 1  | 62 (−47–170)      | 0.26             |
| Deforming or erosive arthritis                                                         | 40 | 15 | <b>52 (20–84)</b> | <b>0.001</b>     |
| Osteoporosis with fracture or vertebral collapse                                       | 23 | 9  | <b>48 (6–91)</b>  | <b>0.025</b>     |
| Avascular necrosis                                                                     | 7  | 3  | 9 (−63–81)        | 0.80             |
| Osteomyelitis                                                                          | 1  | 0  | −17 (−204–171)    | 0.86             |
| Tendon rupture                                                                         | 4  | 2  | 37 (−57–131)      | 0.44             |
| <i>Points ≥1 in the domain</i>                                                         | 89 | 31 | <b>46 (22–70)</b> | <b>&lt;0.001</b> |
| Skin                                                                                   |    |    |                   |                  |
| Scarring chronic alopecia                                                              | 16 | 6  | −11 (−59–37)      | 0.66             |
| Extensive scarring or panniculus                                                       | 10 | 4  | 15 (−45–75)       | 0.62             |
| Skin ulceration                                                                        | 4  | 1  | −46 (−154–62)     | 0.40             |
| <i>Points ≥1 in the domain</i>                                                         | 39 | 14 | 0.3 (−32–33)      | 0.98             |
| Premature gonadal failure                                                              | 19 | 7  | 32 (−13–78)       | 0.16             |
| Diabetes (regardless of treatment)                                                     | 18 | 6  | 8 (−39–55)        | 0.75             |
| Malignancy (exclude dysplasia)                                                         | 11 | 4  | −20 (−81–40)      | 0.51             |

SLICC items and domains represent the independent variable. SLICC: Systemic Lupus International Collaborating Clinics/American College of Rheumatology Damage Index. Significant p values are depicted in bold. FGF23: Fibroblast Growth Factor 23.
